# Supplementary material for: Physiologically Based Pharmacokinetic Modeling for Selumetinib to Evaluate Drug‐Drug Interactions and Pediatric Dose Regimens
Source: PubMed Central journal article supplement — J Clin Pharmacol. 2021 Jul 22;61(11):1493–504. doi: 10.1002/jcph.1935 (PMC9290801; doi:10.1002/jcph.1935), 2021-07-22

AUC ratio with itraconazole

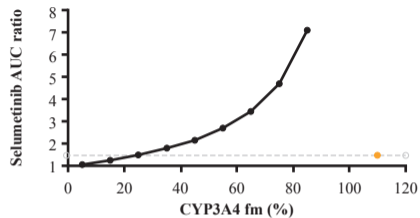

AUC ratio with fluconazole

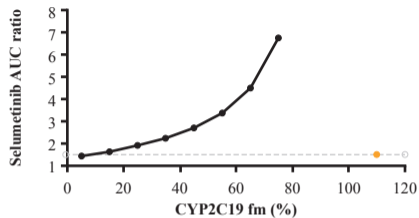

AUC ratio with rifampicin

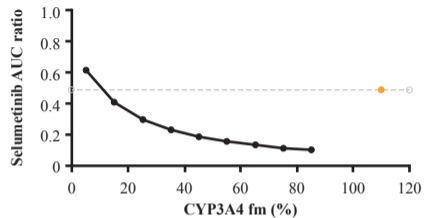 $C_{max}$  ratio with itraconazole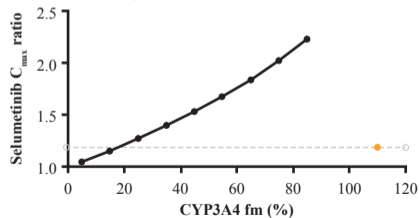 $C_{max}$  ratio with fluconazole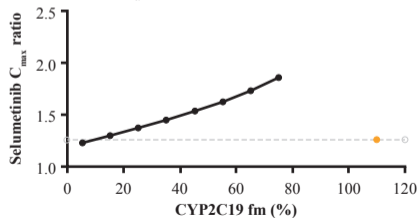 $C_{max}$  ratio with rifampicin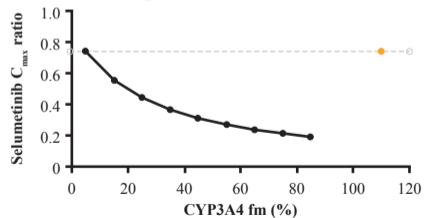

Supplement: JCPH-61-1493-s006.pdf [file JCPH-61-1493-s006.pdf]
