# Supplementary material for: Physiologically Based Pharmacokinetic Modeling for Selumetinib to Evaluate Drug‐Drug Interactions and Pediatric Dose Regimens
Source: PubMed Central journal article supplement — J Clin Pharmacol. 2021 Jul 22;61(11):1493–504. doi: 10.1002/jcph.1935 (PMC9290801; doi:10.1002/jcph.1935), 2021-07-22

**(a)** Without itraconazole

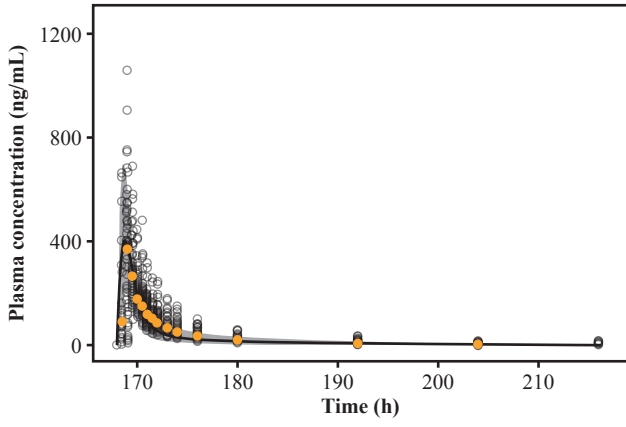

With itraconazole

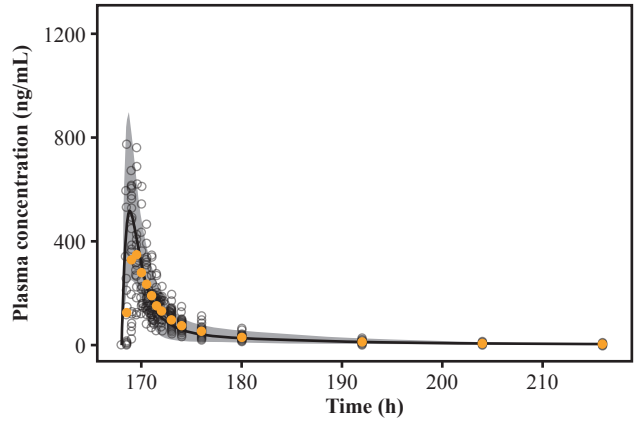

**(b)** Without fluconazole

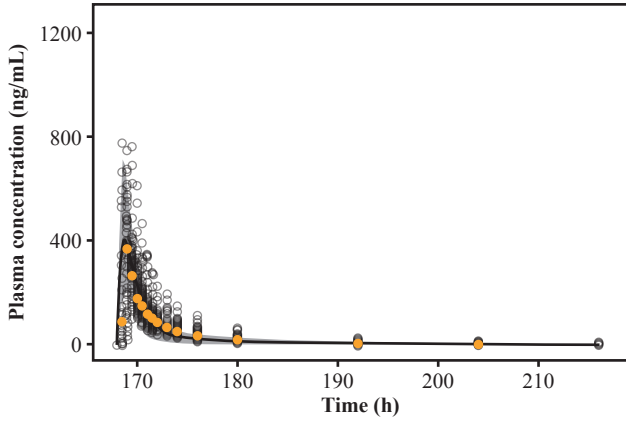

With fluconazole

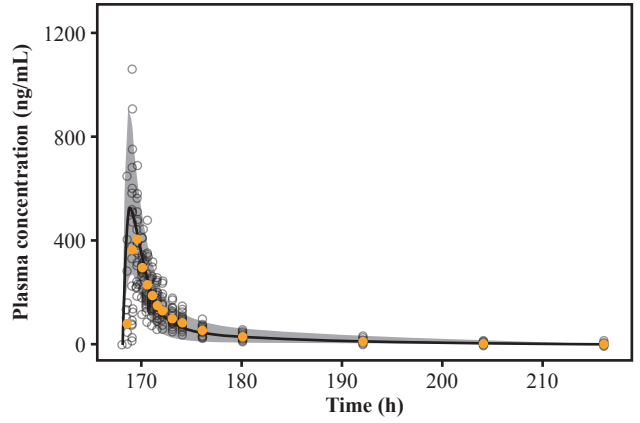

**(c)** Without rifampicin

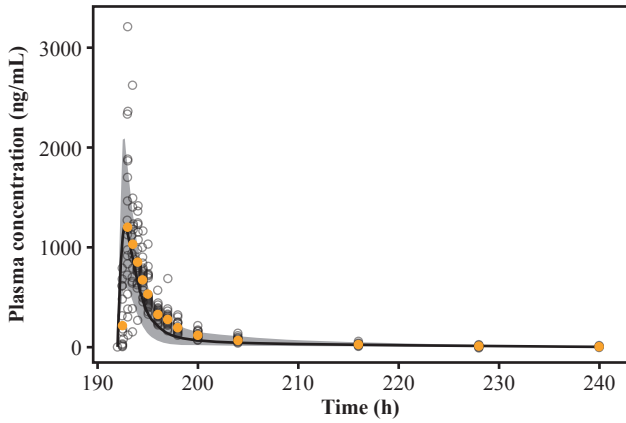

With rifampicin

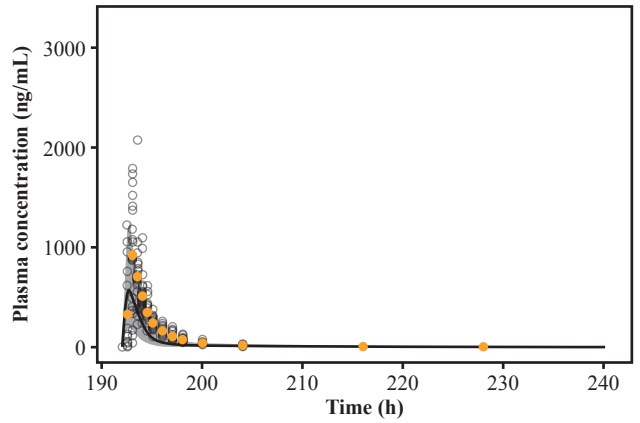

**(d)** 80  $\mu$ g IV dose

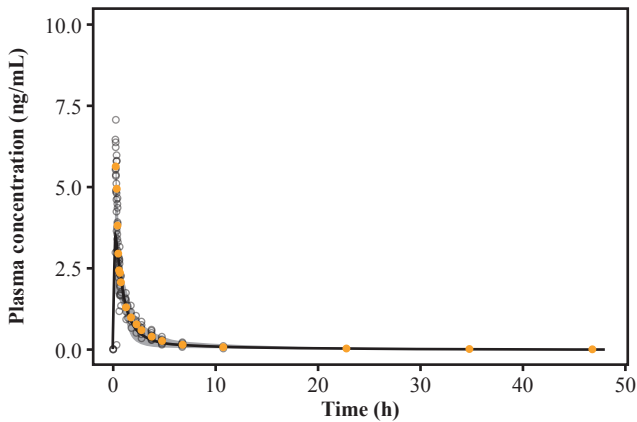

Supplement: JCPH-61-1493-s010.pdf [file JCPH-61-1493-s010.pdf]
