# Supplementary figures and images for: Physiologically Based Pharmacokinetic Modeling for Selumetinib to Evaluate Drug‐Drug Interactions and Pediatric Dose Regimens
Source: PubMed Central journal article supplement — J Clin Pharmacol. 2021 Jul 22;61(11):1493–504. doi: 10.1002/jcph.1935 (PMC9290801; doi:10.1002/jcph.1935), 2021-07-22

Phase 1, 20 mg/m<sup>2</sup>

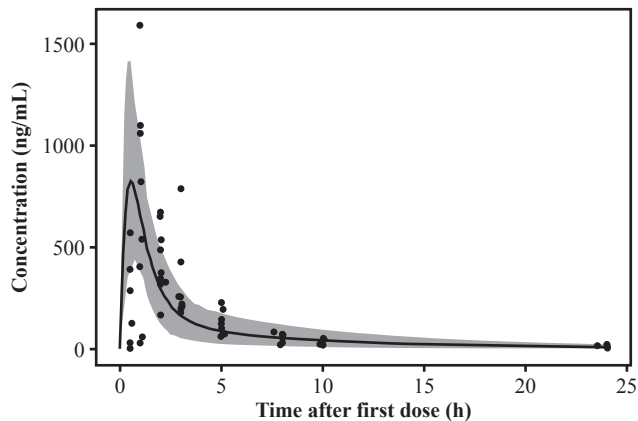

Phase 1, 25 mg/m<sup>2</sup>

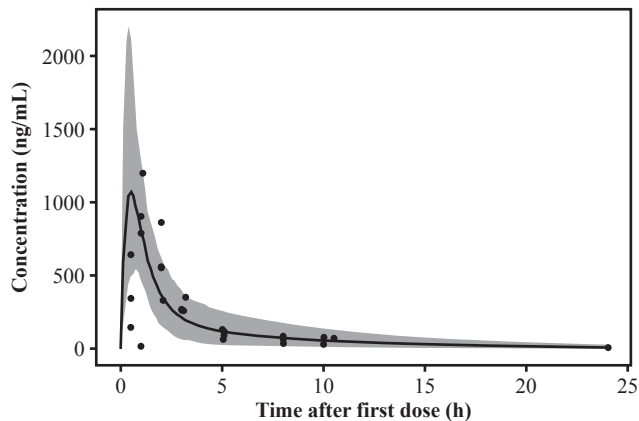

Phase 1, 30 mg/m<sup>2</sup>

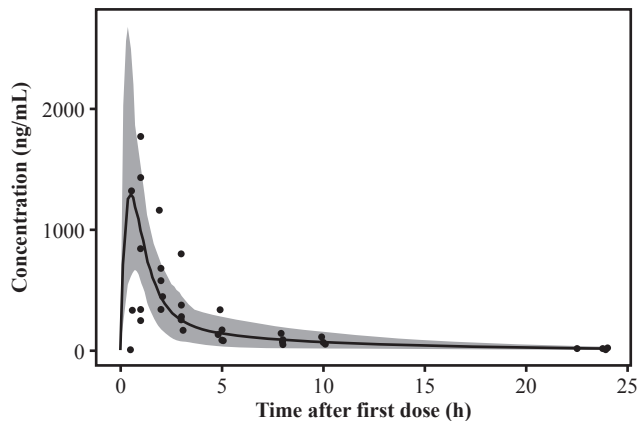

Phase 2, 25 mg/m<sup>2</sup>

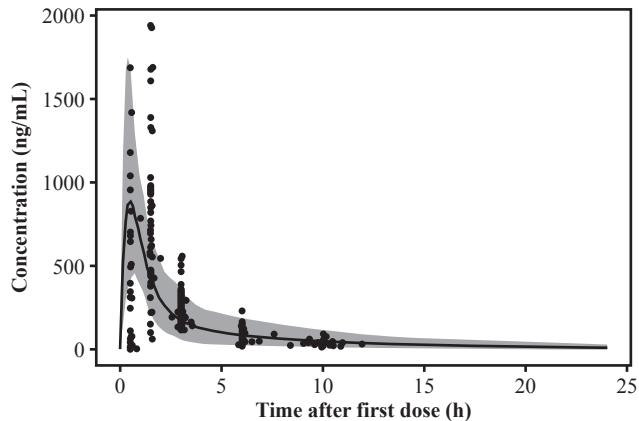

Supplement: JCPH-61-1493-s002.pdf [file JCPH-61-1493-s002.pdf]

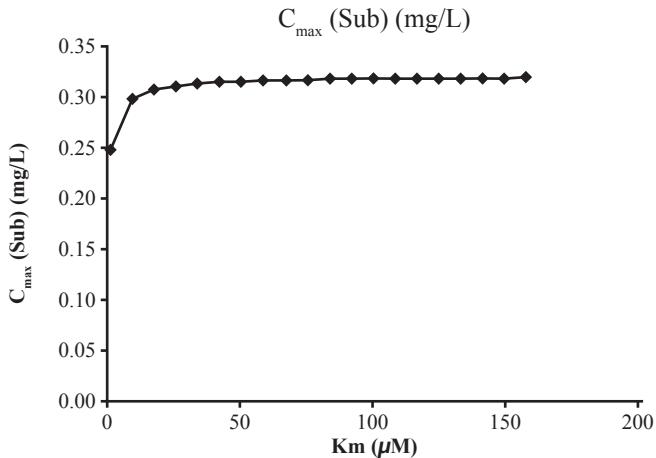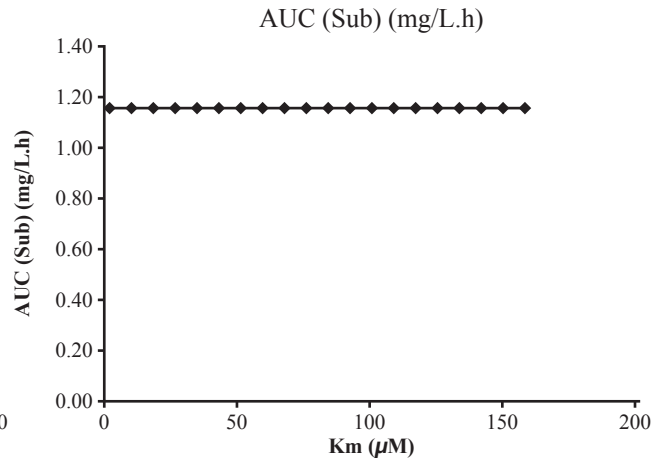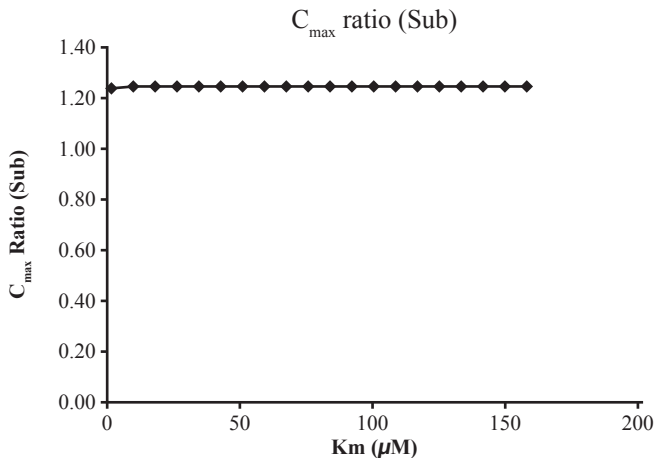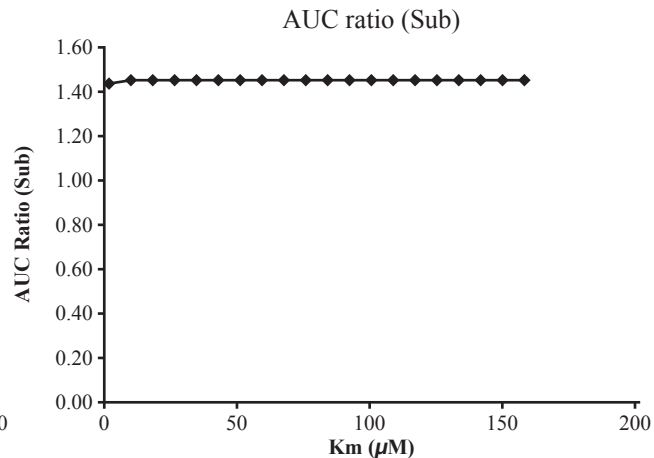

Supplement: JCPH-61-1493-s003.pdf [file JCPH-61-1493-s003.pdf]

$C_{\max}$  (Sub) (mg/L)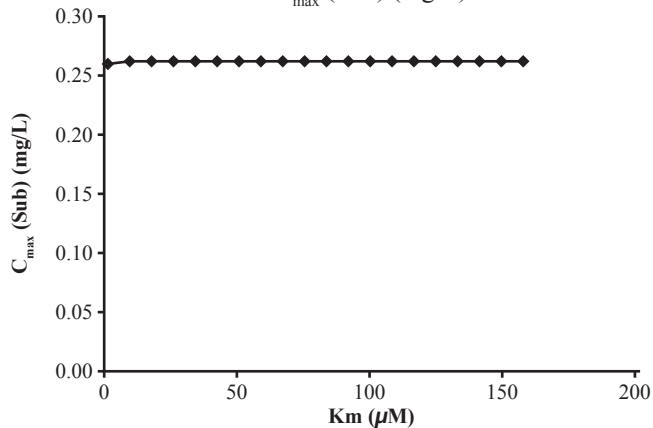

AUC (Sub) (mg/L.h)

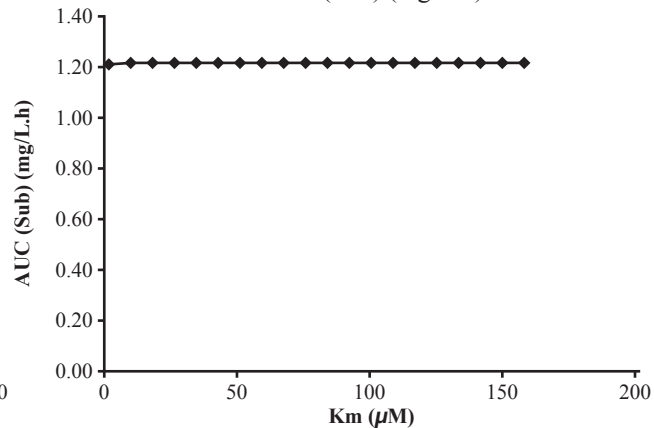 $C_{\max}$  ratio (Sub)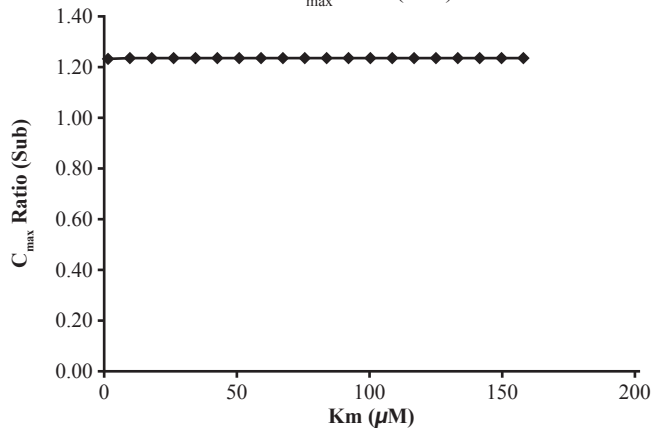

AUC ratio (Sub)

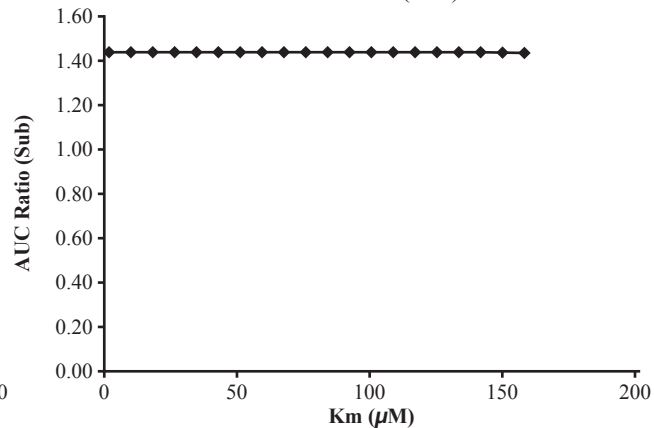

Supplement: JCPH-61-1493-s008.pdf [file JCPH-61-1493-s008.pdf]
